# Supplementary material for: Chloride anion transport and copper-mediated DNA cleavage by C-ring functionalized prodigiosenes
Source: Royal Society of Chemistry journal article supplement (doi:10.1039/b701919j), 2007-01-01
Supplement: b701919j.pdf [file b701919j.pdf]

## Chloride anion transport and copper-mediated DNA cleavage by C-ring functionalized prodigiosenes

Rosa I. Sáez Díaz,<sup>a</sup> Jasmine Regourd,<sup>a</sup> Paul V. Santacroce,<sup>b</sup>

Jeffery T. Davis,<sup>b</sup> David L. Jakeman<sup>c</sup> and Alison Thompson<sup>a\*</sup>

<sup>a</sup>*Department of Chemistry, Dalhousie University, Halifax, Nova Scotia, B3H 4J3 Canada;*

*E-mail: alison.thompson@dal.ca; Fax: 902-494-1310; Tel: 902-494-6421*

<sup>b</sup>*Department of Chemistry and Biochemistry, University of Maryland, College Park, MD*

*20742, USA*

<sup>c</sup>*College of Pharmacy, Dalhousie University, Halifax, Nova Scotia, B3H 3J5, Canada*

## Supplementary information

### Tables of Contents

|                                                                                      |    |
|--------------------------------------------------------------------------------------|----|
| Figure S1 .....                                                                      | 2  |
| Materials and methods .....                                                          | 3  |
| Chloride transport experiments.....                                                  | 3  |
| DNA cleavage experiments.....                                                        | 4  |
| Relaxation of supercoiled plasmid DNA by Cu-prodigiosene mixtures <sup>5</sup> ..... | 4  |
| EC <sub>50</sub> curve for prodigiosene <b>8</b> : .....                             | 5  |
| Electrophoresis gels after 30 min (A) and 90 min (B): .....                          | 6  |
| Prodigiosin ( <b>1</b> ) .....                                                       | 6  |
| Prodigiosene <b>2</b> .....                                                          | 6  |
| Prodigiosene <b>3</b> .....                                                          | 7  |
| Prodigiosene <b>4</b> .....                                                          | 7  |
| Prodigiosene <b>5</b> .....                                                          | 8  |
| Prodigiosene <b>6</b> .....                                                          | 8  |
| Prodigiosene <b>7</b> .....                                                          | 9  |
| Prodigiosene <b>8</b> .....                                                          | 9  |
| Prodigiosene <b>9</b> .....                                                          | 10 |
| Prodigiosene <b>10</b> .....                                                         | 10 |
| Prodigiosene <b>11</b> .....                                                         | 11 |
| References .....                                                                     | 11 |

## Chloride anion transport and copper-mediated DNA cleavage by C-ring functionalized prodigiosenes

Figure S1

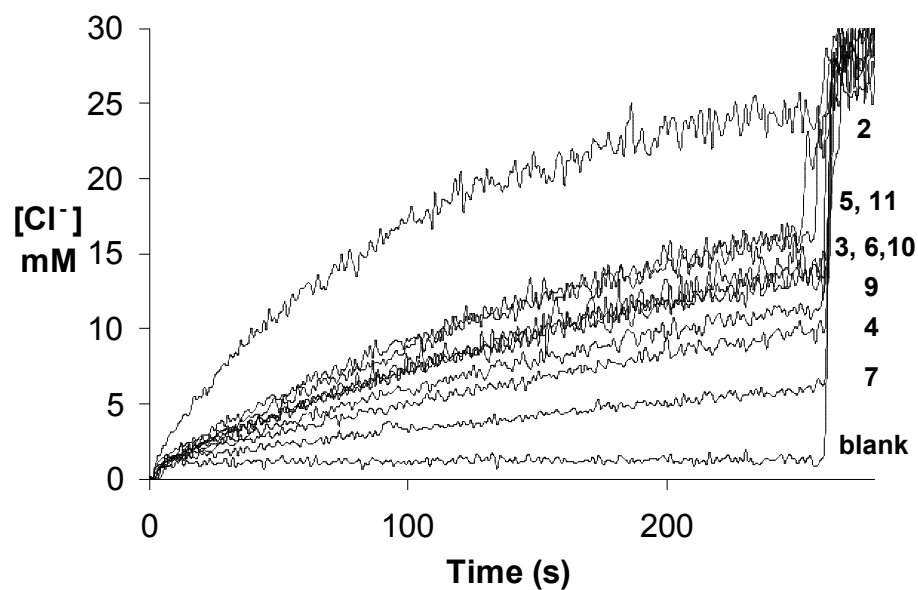

**Fig. S1** Chloride transport across EYPC liposomes (25 °C) containing lucigenin in a 100 mM  $NaNO_3$  – 10 mM sodium phosphate buffer (pH 6.4). Compounds **2-11** were added to give a 1:1000 ligand:lipid ratio. At  $t=0$  s, NaCl was added to give an external  $Cl^-$  concentration of 25 mM. Lucigenin fluorescence was converted to  $[Cl^-]$ . The traces shown are the average of 3 trials.

## Chloride anion transport and copper-mediated DNA cleavage by C-ring functionalized prodigiosenes

### Materials and methods

The samples of all prodigiosenes were synthesized and characterized as previously reported.<sup>1</sup> All reagents, unless stated otherwise, were obtained commercially and used without further purification.

### Chloride transport experiments

EYPC lipid (60 mg) was dissolved in 5 mL of a chloroform/methanol mixture (5 % MeOH). The resulting solution was evaporated under reduced pressure to produce a thin film that was dried *in vacuo* for 2 h. The lipid film was hydrated with 1 mL of a solution of 10 mM sodium phosphate (pH 6.4) containing 100 mM NaNO<sub>3</sub> and 1 mM lucigenin.<sup>2</sup> After 10 freeze/thaw cycles, the liposomes were extruded through a 100 nm polycarbonate membrane 21 times at room temperature. The liposome solution was passed through a Sephadex (G-25) column to remove excess dye (eluant = sodium phosphate buffer, pH 6.4, 100 mM NaNO<sub>3</sub>). The isolated liposomes were diluted in 10 mM sodium phosphate (pH 6.4, 100 mM NaNO<sub>3</sub>) to give a concentration of 25 mM in EYPC, assuming 100 % retention of lipid during the gel filtration process. In a typical experiment, 50 μL of the stock EYPC liposomes were diluted into 2 mL of 10 mM sodium phosphate (pH 6.4, 100 mM NaNO<sub>3</sub>) to give a solution 0.5 mM in lipid. Compounds **1-11** were added to give a 9.0E<sup>-4</sup>:100 ligand:lipid ratio (2.2x10<sup>-4</sup> mM final concentration of **1-11**). To the cuvette containing the EYPC-transporter mixture was added 20 μL of 2.5 M NaCl solution through an injection port to give an external chloride concentration of ~25 mM. The fluorescence of the intravesicular chloride concentration was monitored at excitation 372 nm and emission at 504 nm for 500 s. After 470 s, 0.04 mL of 10 % Triton-X detergent was added to lyse the liposomes. The internal liposome chloride concentration was determined in accordance to previous literature reports.<sup>3</sup> All transport experiments were done in triplicate.

## Chloride anion transport and copper-mediated DNA cleavage by C-ring functionalized prodigiosenes

### DNA cleavage experiments

Supercoiled plasmid pDesR3 DNA was prepared from Nova Blue cells using Qiagen QIA prep Spin Miniprep Kit (Qiagen, Hilden, Germany).<sup>4</sup> The concentration of DNA was determined by OD<sub>260</sub>. Deionized water (18 Ω) was used for all aqueous solutions and manipulations. Agarose gel loading buffer = 40 mM Tris-OAc (pH 8.0), 5 mM EDTA, 40% glycerol, 0.3% bromophenol blue. Electrophoresis 1 x T.A.E. solution buffer = 40 mM Tris-acetic acid (pH 7.7), 2 mM EDTA.

### *Relaxation of supercoiled plasmid DNA by Cu-prodigiosene mixtures<sup>5</sup>*

Reaction mixtures (20 μL total volume) contained 450 ng of supercoiled DNA, 10 mM MOPS (pH 7.4), 100 mM NaCl and the following concentrations of 1:1 Cu(OAc)<sub>2</sub>:prodigiosene 0.5, 2, 5, 10, 15, 20, 25, 30 and 50 μM, generally in an acetonitrile/water (1/1) solution (exceptions are prodigiosene **3** in water/2-propanol (4/1), and prodigiosene **4** in methanol/water (1/1)). Fresh stock solutions of the Cu-prodigiosene mixture were prepared for each assay. Reaction mixtures were incubated for 30 min at 37 °C, and then 10 μL were quenched by the addition of 2 μL of loading buffer. The remaining reaction mixture (10 μL) was incubated for one more hour and after that quenched (again with 2 μL of loading buffer). Samples were loaded onto a 0.8 % agarose gel containing ethidium bromide (0.4 μg/mL). The gels were run in 1 x T.A.E. at 100 V for 30 min and photographed under UV light. DNA bands were quantified with image analysis software (Doc-itLS Version 5.5.5) and the EC<sub>50</sub> values were obtained using the data analysis software (GraFit version 5.0.4).

## Chloride anion transport and copper-mediated DNA cleavage by C-ring functionalized prodigiosenes

*EC*<sub>50</sub> curve for prodigiosene **8**:

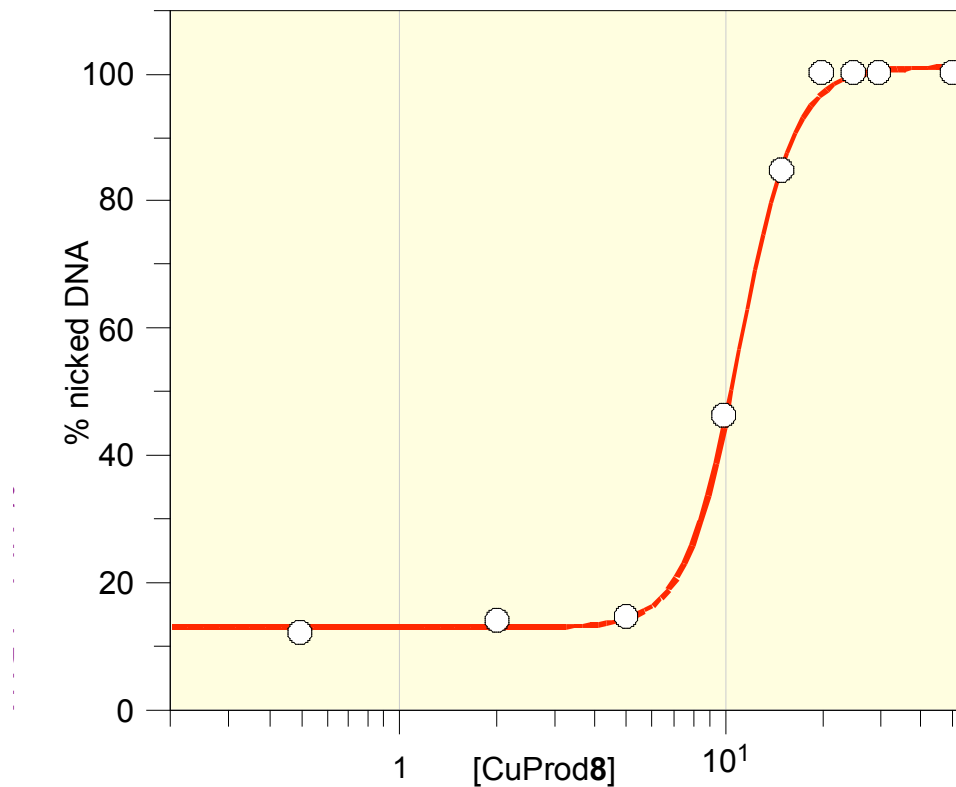

| Parameter        | Value   | Std. Error |
|------------------|---------|------------|
| Y Range          | 88.1952 | 1.4514     |
| EC <sub>50</sub> | 11.0631 | 0.1681     |
| Slope factor     | -5.2020 | 0.3928     |
| Background       | 12.9417 | 0.9702     |

## Chloride anion transport and copper-mediated DNA cleavage by C-ring functionalized prodigiosenes

*Electrophoresis gels after 30 min (A) and 90 min (B):*

### *Prodigiosin (1)*

(concentrations used for the assay = 0.5  $\mu$ M, 1  $\mu$ M, 2  $\mu$ M, 5  $\mu$ M, 10  $\mu$ M, 15  $\mu$ M, 25  $\mu$ M, 30  $\mu$ M and 50  $\mu$ M)

A)

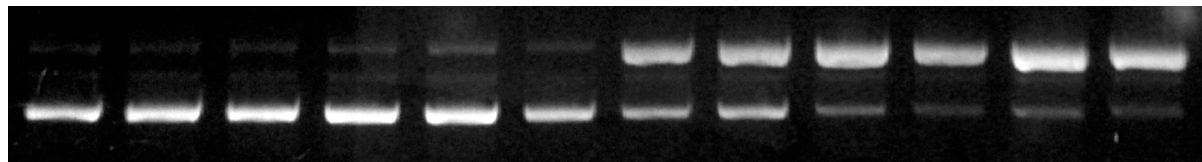

B)

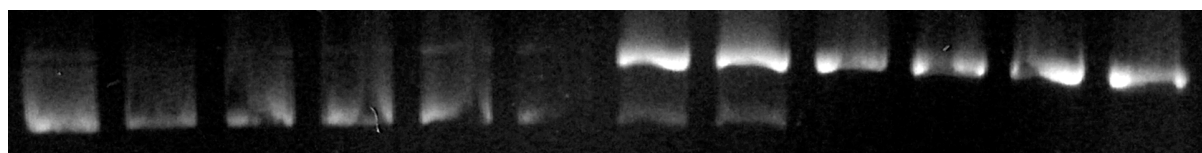

### *Prodigiosene 2*

(concentrations used for the assay = 0.5  $\mu$ M, 2  $\mu$ M, 5  $\mu$ M, 10  $\mu$ M, 15  $\mu$ M and 20  $\mu$ M)

A)

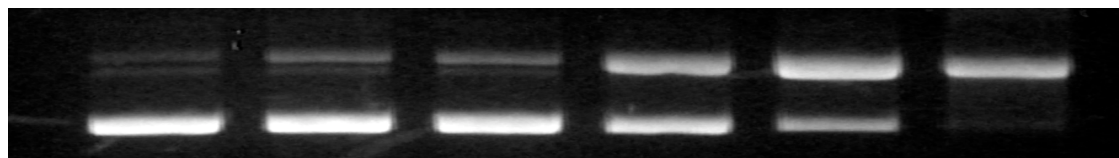

B)

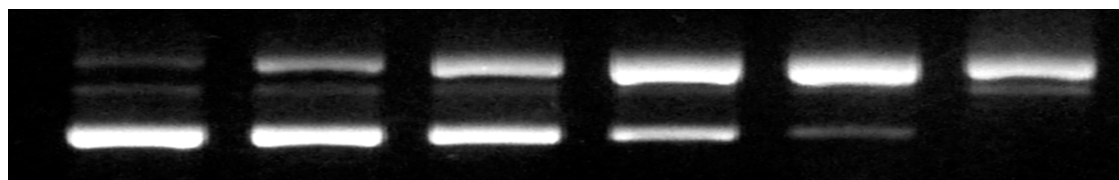

## Chloride anion transport and copper-mediated DNA cleavage by C-ring functionalized prodigiosenes

### *Prodigiosene 3*

A)

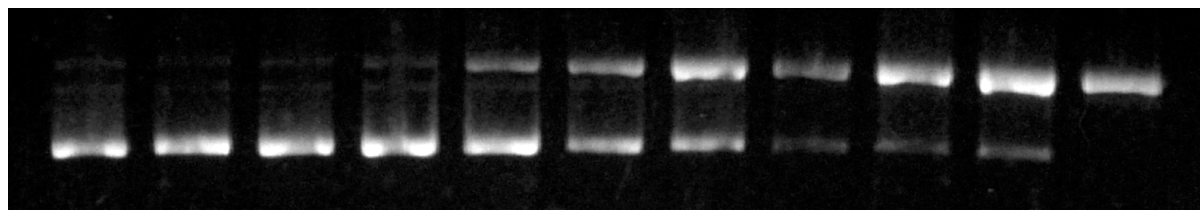

B)

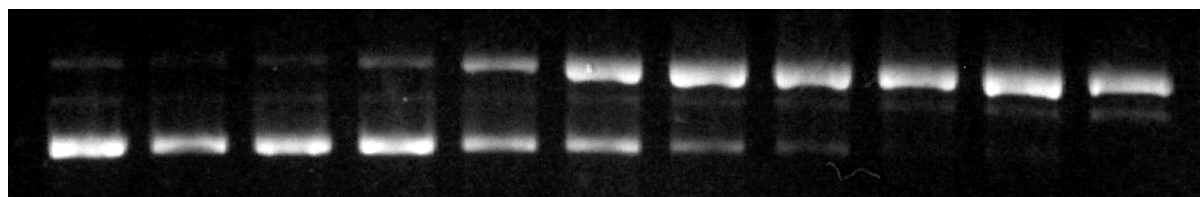

### *Prodigiosene 4*

A)

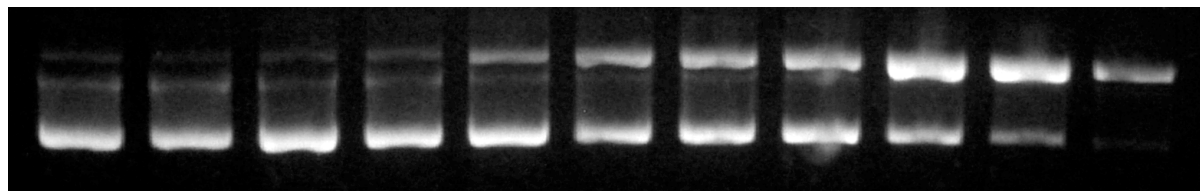

B)

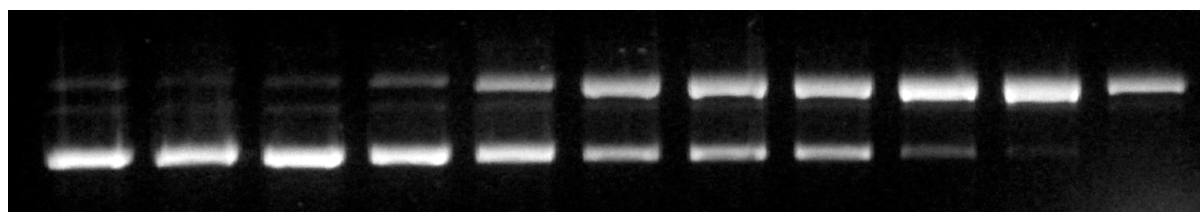

## Chloride anion transport and copper-mediated DNA cleavage by C-ring functionalized prodigiosenes

### *Prodigiosene 5*

A)

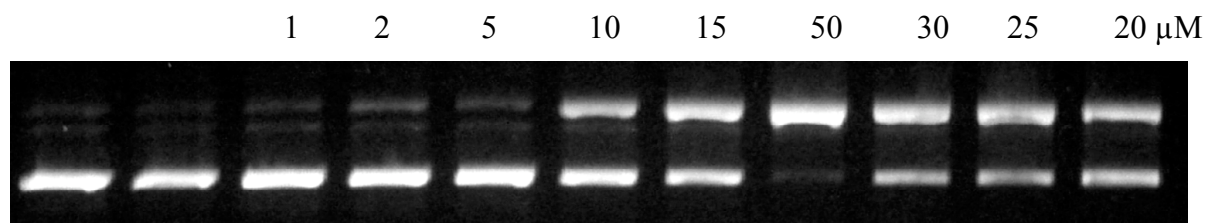

B)

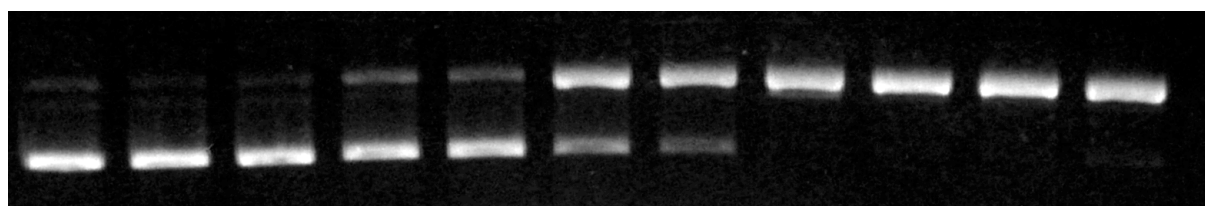

### *Prodigiosene 6*

A)

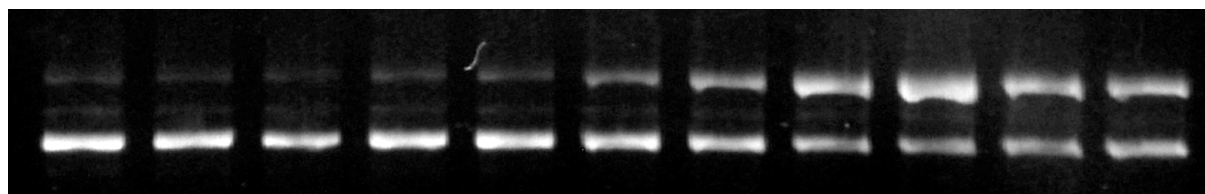

B)

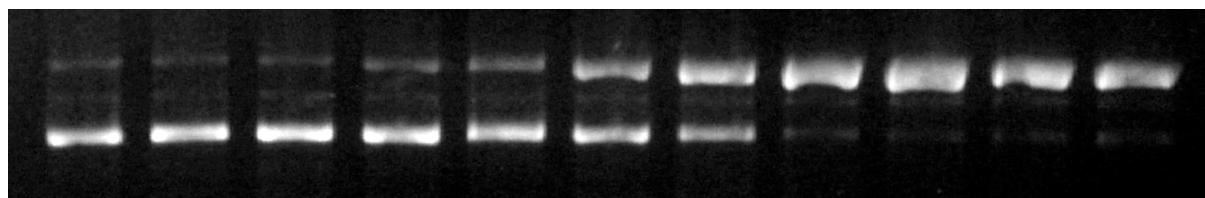



## Chloride anion transport and copper-mediated DNA cleavage by C-ring functionalized prodigiosenes

### *Prodigiosene 7*

A)

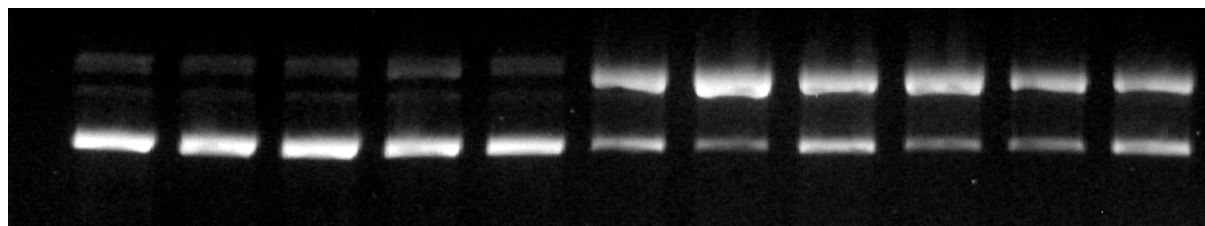

B)

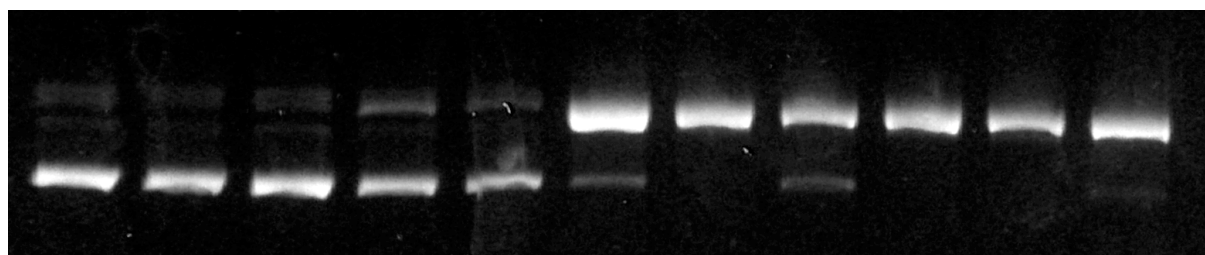

### *Prodigiosene 8*

A)

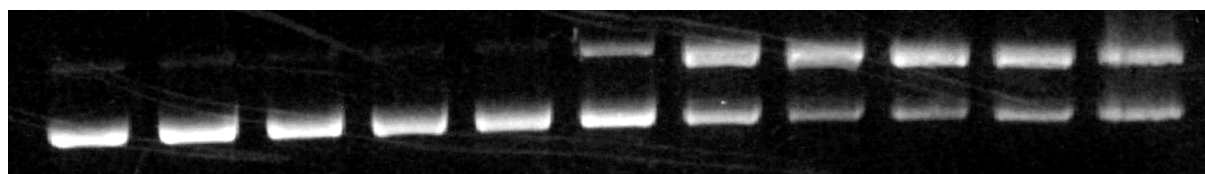

B)

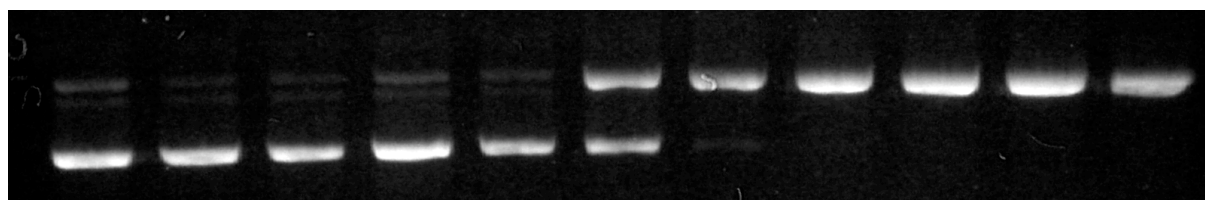

## Chloride anion transport and copper-mediated DNA cleavage by C-ring functionalized prodigiosenes

### *Prodigiosene 9*

A)

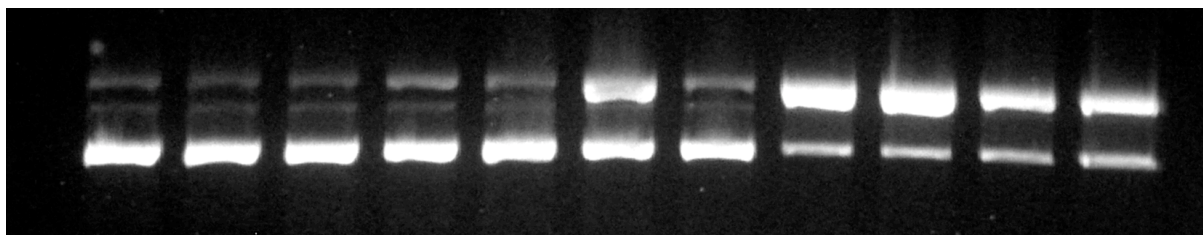

B)

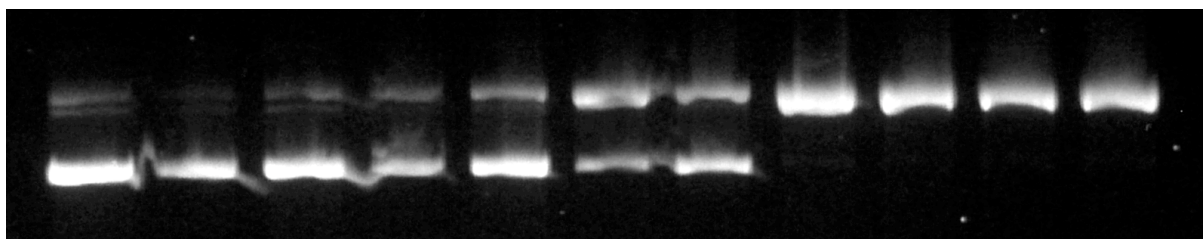

### *Prodigiosene 10*

A)

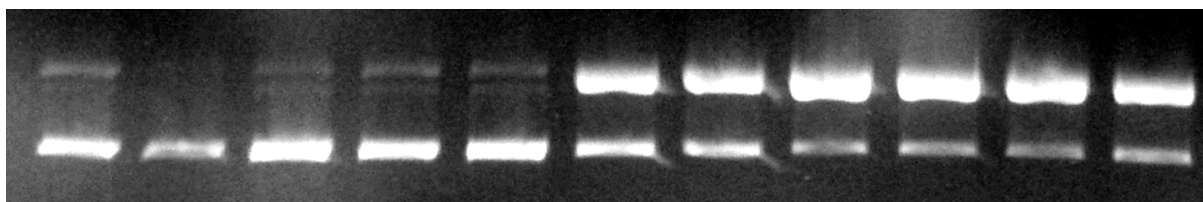

B)

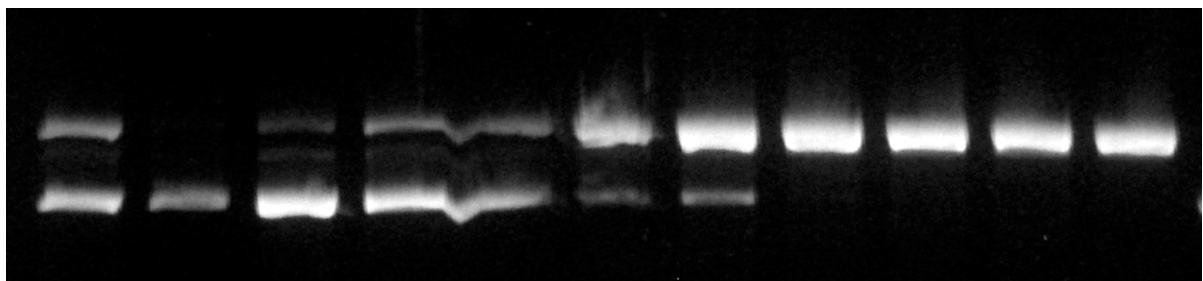

## Chloride anion transport and copper-mediated DNA cleavage by C-ring functionalized prodigiosenes

### *Prodigiosene 11*

A)

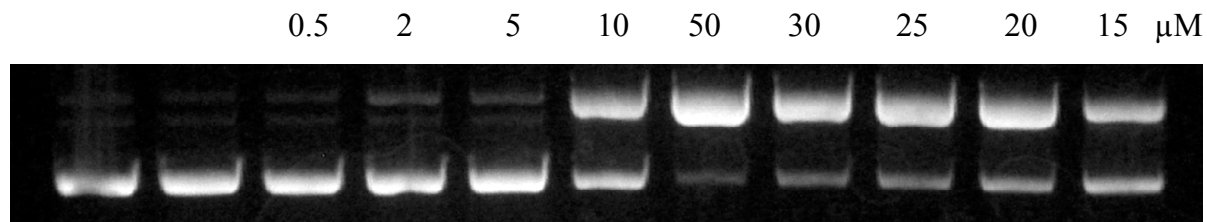

B)

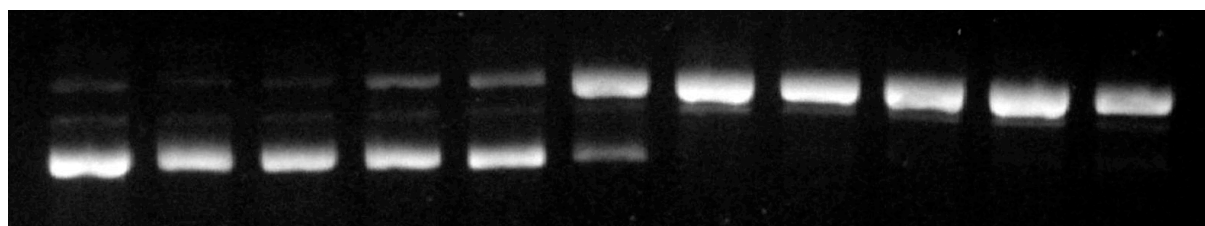

## References

- (1) Regour, J.; Al-Sheikh-Ali, A.; Thompson, A. *J. Med. Chem.* **2007**, in press.
- (2) McNally, B. A.; Koulov, A. V.; Smith, B. D.; Joos, J. B.; Davis, A. P. *Chem. Commun.* **2005**, 1087-1089.
- (3) Seganish, J. L.; Davis, J. T. *Chem. Commun.* **2005**, 5781-5783.
- (4) Zhao, L.; Beyer, N. J.; Borisova, S. A.; Liu, H.-W. *Biochemistry* **2003**, *42*, 14794-14804.
- (5) Melvin, M. S.; Tomlinson, J. T.; Saluta, G. R.; Kucera, G. L.; Lindquist, N.; Manderville, R. A. *J. Am. Chem. Soc.* **2000**, *122*, 6333-6334.
